# Supplementary material for: Structure-based virtual screening and experimental validation of the discovery of inhibitors targeted towards the human coronavirus nucleocapsid protein
Source: Royal Society of Chemistry journal article supplement (doi:10.1039/c5mb00582e), 2015-10-20
Supplement: c5mb00582e2.pdf [file c5mb00582e2.pdf]

**Table S1.** List of the compounds used to test for the SPR assay of full-length HCoV-OC43 NP.

|                  |                                                                                     |                  |                                                                                           |
|------------------|-------------------------------------------------------------------------------------|------------------|-------------------------------------------------------------------------------------------|
| Number           | H1                                                                                  | Number           | H5                                                                                        |
| Chemical formula | 3,3'-Methylenebis(4-hydroxycoumarin)                                                | Chemical formula | N-(6-Oxo-5,6-dihydrophenanthridin-2-yl)-(N,N-dimethylamino)acetamide hydrochloride (PJ34) |
| structure        | 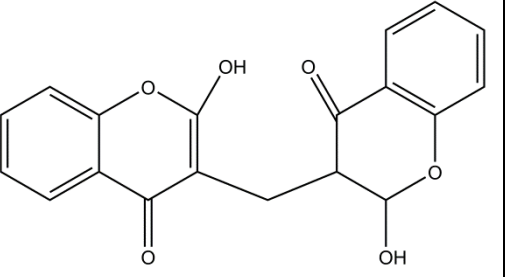   | structure        |         |
| Number           | H2                                                                                  | Number           | H6                                                                                        |
| Chemical formula | 1-(5-Chloro-2-hydroxy-4-methylphenyl)-3-phenyl-1,3-propanedione                     | Chemical formula | 7-Allyl-7,8-dihydro-8-oxoguanosine                                                        |
| structure        |   | structure        |        |
| Number           | H3                                                                                  | Number           | H7                                                                                        |
| Chemical formula | 6-chloro-7-(2-morpholin-4-yl-ethylamino)quinoline-5,8dione                          | Chemical formula | N,N-Bis(2,5-dihydroxybenzylidene)ethylenediamine                                          |
| structure        |  | structure        |       |
| Number           | H4                                                                                  | Number           | H8                                                                                        |
| Chemical formula | 1-(5-Bromo-2-hydroxyphenyl)-3-phenyl-1,3-propanedione                               | Chemical formula | 6-(chloromethyl)-2-[(4-methoxyphenoxy)methyl]pyrimidin-4-ol                               |

structure

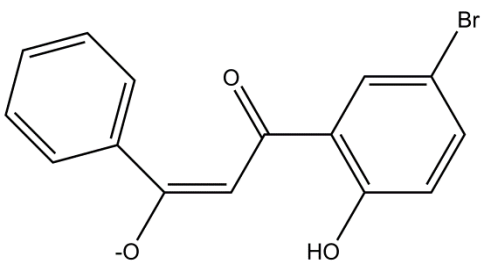

structure

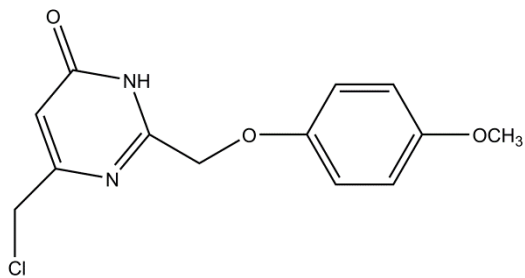

**Table S2.** The compounds obtained from virtual screening that affected the RNA-binding capacity of N protein.

| No. | Compound                                                                           | Inhibition of RNA-binding activity |
|-----|------------------------------------------------------------------------------------|------------------------------------|
| H1  | 3,3'-Methylenebis(4-hydroxycoumarin)                                               | - <sup>a</sup>                     |
| H2  | 1-(5-Chloro-2-hydroxy-4-methylphenyl)-3-phenyl-1,3-propanedione                    | -                                  |
| H3  | 6-chloro-7-(2-morpholin-4-yl-ethylamino)quinoline-5,8dione                         | ++ <sup>b</sup>                    |
| H4  | 1-(5-Bromo-2-hydroxyphenyl)-3-phenyl-1,3-propanedione                              | -                                  |
| H5  | N-(6-Oxo-5,6-dihydrophenanthridin-2-yl)-(N,N-dimethylamino)acetamide hydrochloride | + <sup>c</sup>                     |
| H6  | 7-Allyl-7,8-dihydro-8-oxoguanosine                                                 | -                                  |
| H7  | N,N-Bis(2,5-dihydroxybenzylidene)ethylenediamine                                   | -                                  |
| H8  | 6-(chloromethyl)-2-[(4-methoxyphenoxy)methyl]pyrimidin-4-ol                        | -                                  |

<sup>a</sup> No significant inhibition was observed.

<sup>b</sup> decreased the RNA-binding capacity of N protein by 20%.

<sup>c</sup> decreased the RNA-binding capacity of N protein by 10%.
