# Supplementary figures and images for: Structure-based virtual screening and experimental validation of the discovery of inhibitors targeted towards the human coronavirus nucleocapsid protein
Source: Royal Society of Chemistry journal article supplement (doi:10.1039/c5mb00582e), 2015-10-20

**Figure S1**

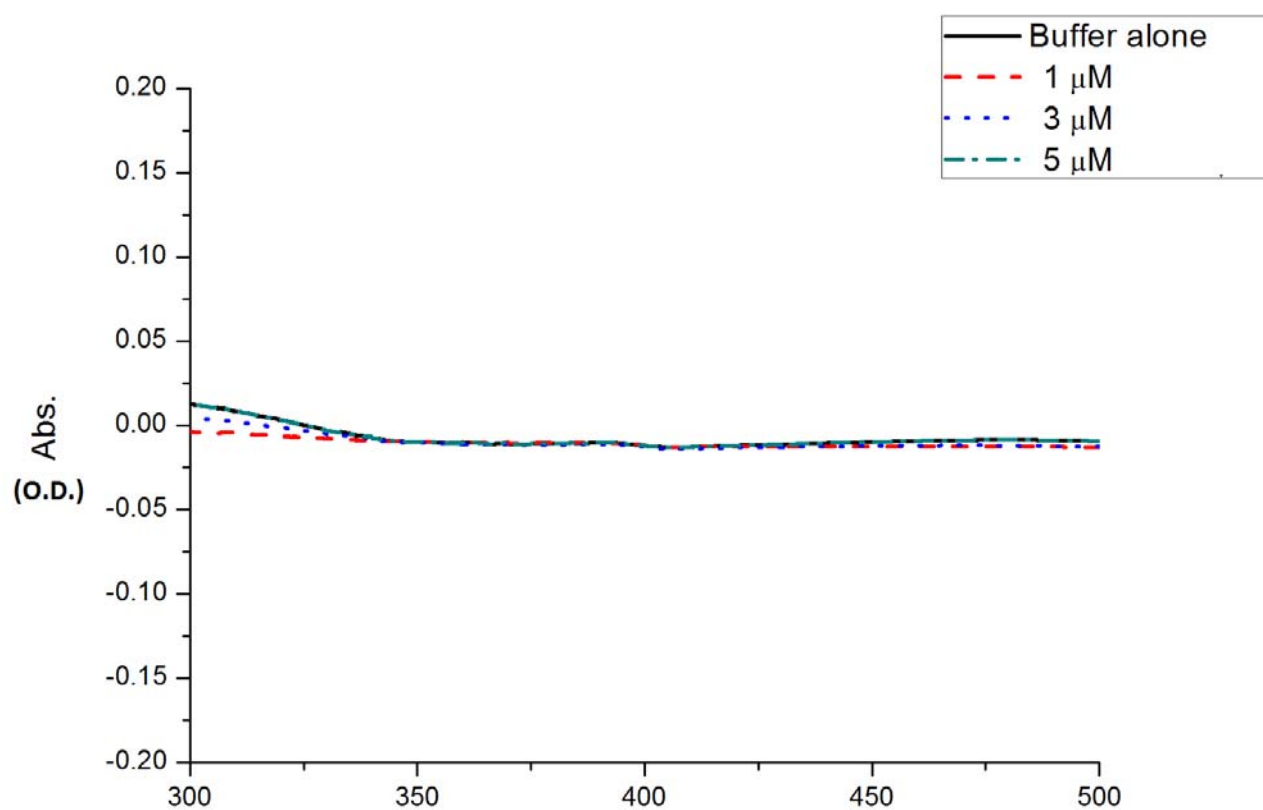

Figure S2

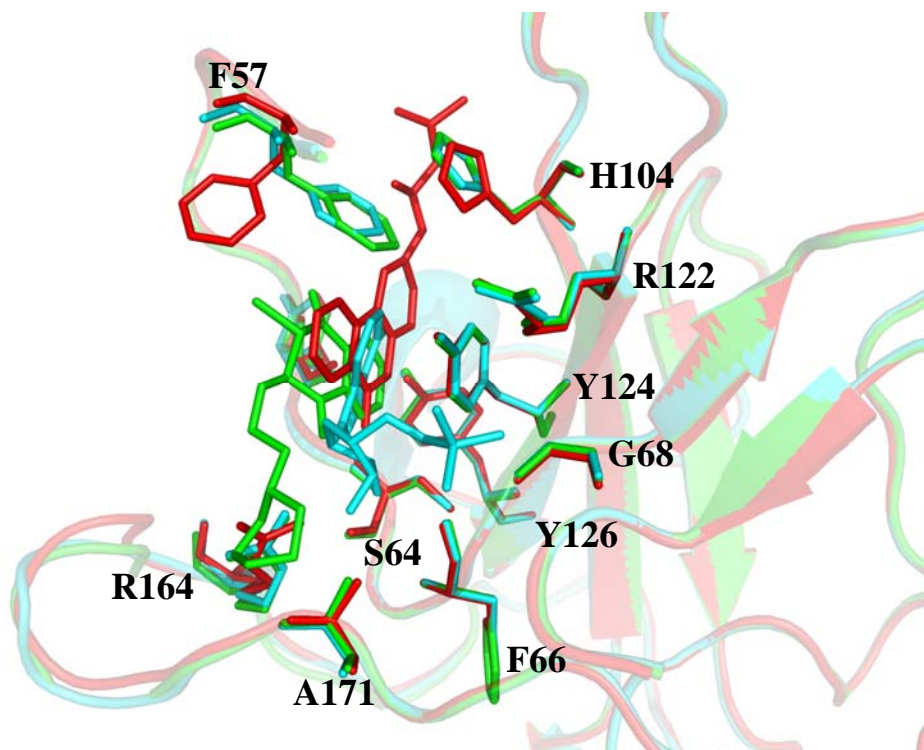

Supplement: c5mb00582e1.pdf [file c5mb00582e1.pdf]
